# Supplementary material
Source: ML conference proceedings conference paper supplement (https://proceedings.neurips.cc/paper_files/paper/2014/hash/32b30a250abd6331e03a2a1f16466346-Abstract.html)
Supplement: Supplementary file [file 32b30a250abd6331e03a2a1f16466346-Supplemental.zip]

# On the Statistical Consistency of Plug-in Classifiers for Non-decomposable Performance Measures

## Appendix

### A Experimental Details

#### A.1 Synthetic data experiments

We use data drawn from a distribution  $D$  over  $(\mathcal{X} = \mathbb{R}^{10}) \times \{\pm 1\}$  that satisfies Assumption B (and therefore assumption A); recall that our plug-in consistency results for the  $F_1$  and G-TP/PR measures apply to distributions that satisfy Assumption A (see Section 4), and the consistency result for G-Mean holds for distributions that satisfy Assumption B (see Section 5). The specifics of our experiments mirror those used in [16] and are listed here for completeness: positive examples ( $y = 1$ ) are drawn from  $\mathcal{N}(\mu, \Sigma)$  with probability  $p \in (0, 1)$  and negative examples ( $y = -1$ ) drawn from  $\mathcal{N}(-\mu, \Sigma)$  with probability  $(1 - p)$ ;  $\mu$  is drawn uniformly at random from  $\{\pm 1\}^{10}$  and  $\Sigma \in \mathbb{R}^{10 \times 10}$  is drawn from a Wishart distribution with 20 degrees of freedom and a randomly drawn invertible positive semidefinite scale matrix. As pointed out earlier, the optimal classifier for each performance measure considered here under this distribution is linear, making it sufficient to learn a linear model (see Section A.4).

We evaluate the statistical regret of the empirical plug-in method (Algorithm 1 with  $\alpha = 0.5$ ) and compare it against  $\text{SVM}^{\text{perf}}$  with linear kernel (SVMPerf) adapted to optimize the performance measures considered here<sup>5</sup>, and the Plug-in algorithm with a default threshold 0.5 (Plug-in (0-1)). The empirical plug-in algorithm (denoted for the three performance measures respectively as Plug-in ( $F_1$ ), Plug-in (G-TP/PR) and Plug-in (GM)) randomly splits the input data  $S$  (drawn from  $D$ ) into samples  $S_1$  and  $S_2$  for the purposes of learning a class probability estimate and choosing an appropriate threshold respectively; we use regularized (linear) logistic regression for learning a class probability estimate from  $S_1$ , with the regularization parameter set to  $1/\sqrt{|S_1|}$ , in order to satisfy the  $L_1$ -consistency requirement in Theorem 1 (see [16, 20] for details). The Plug-in (0-1) method learns a class probability estimate using the entire input data  $(S_1, S_2)$ , with the regularization parameter set to  $1/\sqrt{|S|}$ . The  $\text{SVM}^{\text{perf}}$  algorithm also uses the entire input data  $(S_1, S_2)$ , with the regularization parameter selected from the range  $\{10^{-3}, 10^{-2}, \dots, 10^1\}$  via 5-fold cross-validation over the training sample<sup>6</sup>.

#### A.2 Real data experiments

For experiments with real data sets, we report the performance of the learned classifiers on separately held test data (we perform a random 2:1 train-test split of the original data, preserving class proportions). For the empirical plug-in algorithm, the parameter  $\alpha$  in Algorithm 1 was set to 0.8. The regularization parameter for  $\text{SVM}^{\text{perf}}$  was chosen from the range  $\{10^{-7}, 10^{-2}, \dots, 10^4\}$  and that for logistic regression was chosen from the range  $\{10^{-3}, 10^{-2}, \dots, 10^1\}$  using 5-fold cross validation over the corresponding training sample.

#### A.3 Additional results on real data

Table 2 summarizes all the real data sets that have been used in our experiments (both in Section 6 and this section). Figure 4 shows the test performances of the plug-in (with both the empirically chosen threshold and default threshold) and  $\text{SVM}^{\text{perf}}$  methods w.r.t.  $F_1$ , G-TP/PR and G-Mean measures over data sets included in Table 2 that were not already covered in Figure 3. Table 3 lists experiment outputs for all datasets, all algorithms and all performance measures. Once again, it

<sup>5</sup>We used the  $\text{SVM}^{\text{perf}}$  routine provided in [http://www.cs.cornell.edu/people/tj/svm\\_light/svm\\_perf.html](http://www.cs.cornell.edu/people/tj/svm_light/svm_perf.html) for the  $F_1$ -measure; we made necessary modifications to this code (as prescribed in [12]) to optimize G-TP/PR and G-Mean.

<sup>6</sup>Here, we cannot set the regularization parameter to  $1/\sqrt{|S|}$  since the theoretical prescriptions of [20] are not applicable to multivariate extension of hinge loss optimized by  $\text{SVM}^{\text{perf}}$ .

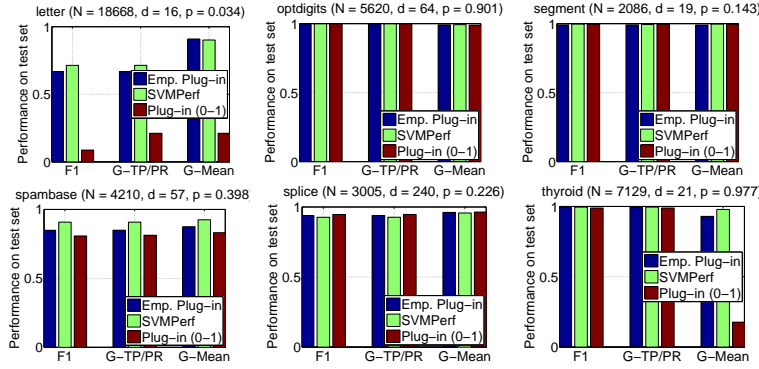

Figure 4: Experiments on real data: results for empirical Plug-in,  $\text{SVM}^{\text{perf}}$  and Plug-in (0-1) methods (with linear models) on several UCI data sets in terms of  $F_1$ , G-TP/PR and G-Mean performance measures. Here  $N, d, p$  refer to the number of instances, number of features and fraction of positives in the data set respectively.

can be observed that the empirical Plug-in is competitive with  $\text{SVM}^{\text{perf}}$  and outperforms the Plug-in (0-1) method in most cases.

Table 2: Summary of real data sets used in this study

| Data sets | #examples | #features | $p = \mathbf{P}(y = 1)$ |
|-----------|-----------|-----------|-------------------------|
| car       | 1728      | 21        | 0.038                   |
| chemo-a1a | 2111      | 1021      | 0.024                   |
| nursery   | 12960     | 27        | 0.026                   |
| pendigits | 10992     | 17        | 0.096                   |
| letter    | 18668     | 16        | 0.034                   |
| optdigits | 5620      | 64        | 0.901                   |
| segment   | 2086      | 19        | 0.143                   |
| spambase  | 4210      | 57        | 0.398                   |
| splice    | 3005      | 240       | 0.226                   |
| thyroid   | 7129      | 21        | 0.977                   |

#### A.4 Regret calculation for synthetic data

As mentioned in Section A.1, the distribution  $D$  over  $\mathbb{R}^{10} \times \{\pm 1\}$  that we consider consists of multivariate Gaussian class conditional distributions, with positive instances being drawn from  $\mathcal{N}(\mu, \Sigma)$  and negative instances being drawn from  $\mathcal{N}(-\mu, \Sigma)$ . We denote the probability density functions (pdfs) corresponding to  $x|y = 1$  and  $x|y = -1$  as  $f_+$  and  $f_-$  respectively.

We first show that any classifier obtained by thresholding the the class probability function  $\eta$  under the above distribution is linear. For any  $x \in \mathbb{R}^{10}$ , we have

$$\begin{aligned}
\eta(x) &= \mathbf{P}(y = 1|x) = \frac{\mathbf{P}(x|y = 1) \cdot \mathbf{P}(y = 1)}{\mathbf{P}(x|y = 1) \cdot \mathbf{P}(y = 1) + \mathbf{P}(x|y = -1) \cdot \mathbf{P}(y = -1)} \\
&= \frac{p \cdot f_+(x)}{p \cdot f_+(x) + (1-p) \cdot f_-(x)} \\
&= \frac{1}{1 + e^{-f(x)}},
\end{aligned}$$

where  $f(x) = \ln\left(\frac{p \cdot f_+(x)}{(1-p) \cdot f_-(x)}\right) = 2\mu^T \Sigma^{-1} x + \ln\left(\frac{p}{1-p}\right)$  turns out to be a linear function of  $x$ . As a result, any thresholded classifier of the form  $\text{sign} \circ (\eta(x) - c)$ , for some  $c \in (0, 1)$ , can be written as a linear classifier:  $\text{sign} \circ (f(x) - \ln(c/(1-c)))$ .

Table 3: Results from experiments on all real datasets. For each dataset and performance measure, the algorithm outputs with the highest and second-highest mean performance are highlighted in boldface and italics respectively.

| Data sets | Algorithm           | F <sub>1</sub>         | G-TP/PR                | G-Mean                 |
|-----------|---------------------|------------------------|------------------------|------------------------|
| car       | Emp. Plug-in        | <i>0.8053 ± 0.0777</i> | <i>0.8231 ± 0.0691</i> | <i>0.9738 ± 0.0164</i> |
|           | SVM-Perf            | <b>0.8442 ± 0.0327</b> | <b>0.8426 ± 0.0367</b> | <b>0.9797 ± 0.0179</b> |
|           | Plug-in (0-1)       | 0.7550 ± 0.0643        | 0.7679 ± 0.0598        | 0.8027 ± 0.0517        |
| chemo-a1a | Emp. Plug-in        | <i>0.7182 ± 0.1286</i> | <b>0.7393 ± 0.1044</b> | <i>0.8640 ± 0.0997</i> |
|           | SVM <sup>perf</sup> | <b>0.7256 ± 0.0541</b> | <i>0.7044 ± 0.0560</i> | <b>0.9172 ± 0.0801</b> |
|           | Plug-in (0-1)       | 0.6945 ± 0.0659        | 0.7214 ± 0.0557        | 0.7202 ± 0.0382        |
| nursery   | Emp. Plug-in        | <b>0.7545 ± 0.0319</b> | <i>0.7542 ± 0.0302</i> | <b>0.9668 ± 0.0162</b> |
|           | SVM <sup>perf</sup> | <i>0.7479 ± 0.0138</i> | <b>0.7549 ± 0.0120</b> | <i>0.9609 ± 0.0084</i> |
|           | Plug-in (0-1)       | 0.4478 ± 0.0425        | 0.5287 ± 0.0335        | 0.5406 ± 0.0334        |
| pendigits | Emp. Plug-in        | 0.9770 ± 0.0073        | 0.9772 ± 0.0072        | <i>0.9944 ± 0.0037</i> |
|           | SVM <sup>perf</sup> | <b>0.9991 ± 0.0009</b> | <b>0.9984 ± 0.0018</b> | <b>0.9986 ± 0.0010</b> |
|           | Plug-in (0-1)       | <i>0.9795 ± 0.0063</i> | <i>0.9795 ± 0.0063</i> | 0.9873 ± 0.0068        |
| letter    | Emp. Plug-in        | <i>0.6685 ± 0.0239</i> | <i>0.6668 ± 0.0240</i> | <b>0.9093 ± 0.0104</b> |
|           | SVM <sup>perf</sup> | <b>0.7143 ± 0.0324</b> | <b>0.7144 ± 0.0304</b> | <i>0.9017 ± 0.0138</i> |
|           | Plug-in (0-1)       | 0.0876 ± 0.0268        | 0.2117 ± 0.0359        | 0.2117 ± 0.0359        |
| optdigits | Emp. Plug-in        | <i>0.9986 ± 0.0005</i> | <i>0.9912 ± 0.0034</i> | <i>0.9986 ± 0.0005</i> |
|           | SVM <sup>perf</sup> | 0.9985 ± 0.0005        | <b>0.9925 ± 0.0020</b> | 0.9985 ± 0.0006        |
|           | Plug-in (0-1)       | <b>0.9987 ± 0.0002</b> | 0.9888 ± 0.0023        | <b>0.9987 ± 0.0002</b> |
| segment   | Emp. Plug-in        | 0.9911 ± 0.0114        | 0.9911 ± 0.0113        | 0.9899 ± 0.0082        |
|           | SVM <sup>perf</sup> | <b>0.9964 ± 0.0034</b> | <b>0.9964 ± 0.0033</b> | <b>0.9961 ± 0.0034</b> |
|           | Plug-in (0-1)       | <i>0.9959 ± 0.0031</i> | <i>0.9959 ± 0.0031</i> | <i>0.9959 ± 0.0031</i> |
| spambase  | Emp. Plug-in        | <i>0.8489 ± 0.0145</i> | <i>0.8749 ± 0.0101</i> | <i>0.8493 ± 0.0143</i> |
|           | SVM <sup>perf</sup> | <b>0.9078 ± 0.0082</b> | <b>0.9250 ± 0.0068</b> | <b>0.9077 ± 0.0088</b> |
|           | Plug-in (0-1)       | 0.8076 ± 0.0129        | 0.8317 ± 0.0105        | 0.8126 ± 0.0126        |
| splice    | Emp. Plug-in        | <i>0.9391 ± 0.0100</i> | <i>0.9393 ± 0.0099</i> | <i>0.9615 ± 0.0097</i> |
|           | SVM <sup>perf</sup> | 0.9264 ± 0.0133        | 0.9268 ± 0.0142        | 0.9570 ± 0.0060        |
|           | Plug-in (0-1)       | <b>0.9465 ± 0.0093</b> | <b>0.9466 ± 0.0093</b> | <b>0.9636 ± 0.0058</b> |
| thyroid   | Emp. Plug-in        | <i>0.9941 ± 0.0008</i> | <i>0.9941 ± 0.0008</i> | <i>0.9293 ± 0.0240</i> |
|           | SVM <sup>perf</sup> | <b>0.9950 ± 0.0009</b> | <b>0.9952 ± 0.0008</b> | <b>0.9784 ± 0.0100</b> |
|           | Plug-in (0-1)       | 0.9887 ± 0.0002        | 0.9887 ± 0.0002        | 0.1769 ± 0.0749        |

We next describe how one can compute the  $\Psi$ -regret of a linear classifier  $h : \mathbb{R}^{10} \rightarrow \{\pm 1\}$  under the given distribution:

$$\text{regret}_D^\Psi[h] = \mathcal{P}_D^{\Psi,*} - \mathcal{P}_D^\Psi[h].$$

In particular, we shall describe how the values of  $\mathcal{P}_D^\Psi[h]$  and  $\mathcal{P}_D^{\Psi,*}$  in the above expression can be computed for the given distribution  $D$ .

We start with the procedure outlined in [16] for calculating the performance measure  $\mathcal{P}_D^\Psi$  for any linear classifier  $h(x) = \text{sign} \circ (w^\top x + b)$ , where (for our purpose)  $w \in \mathbb{R}^{10}$  and  $b \in \mathbb{R}$ . The TPR of  $h$  is given by:

$$\text{TPR}_D[h] = \mathbf{P}(h(x) = 1 | y = 1) = \int_{x | w^\top x + b \geq 0} f_+(x) dx.$$

It can be seen that  $w^\top x | y = 1$  follows the normal distribution  $\mathcal{N}(w^\top x, w^\top \Sigma w)$ , and therefore by change of variables, we have

$$\text{TPR}_D[h] = \int_{-b}^{\infty} g_+(x) dx,$$

where  $g_+$  is the pdf corresponding to  $\mathcal{N}(w^\top x, w^\top \Sigma w)$ . Likewise, the TNR for  $h$  is given by:

$$\text{TNR}_D[h] = \int_{-\infty}^{-b} g_-(x) dx,$$

where  $g_-$  is the pdf corresponding to  $\mathcal{N}(-w^\top x, w^\top \Sigma w)$ . This way, given  $w$  and  $b$ , both TPR and TNR are straightforward to determine, and consequently so is any performance measure that is a function  $\Psi$  of these quantities.

We next describe how the optimal value of the given performance measure  $\mathcal{P}_D^{\Psi,*}$  can be computed. Since the given distribution satisfies Assumptions A and B, the optimal classifier for all performance measures considered in this work is obtained by suitably thresholding the class probability function  $\eta$ ; hence the optimal value  $\mathcal{P}_D^{\Psi,*}$  for the given measure can be computed by performing a line search over  $(0, 1)$  and picking the threshold  $c^* \in (0, 1)$  for which the linear classifier  $\text{sign} \circ (f(x) - c^*)$  maximizes the performance measure.

## B Complete Proofs for Lemmas

### B.1 Complete proof for Lemma 2

*Proof.* First, we simplify what we need to prove. We need to show that for a fixed  $c \in (0, 1)$ ,

$$\begin{aligned} \text{TPR}_D[\text{sign} \circ (\hat{\eta}_S(x) - c)] &\xrightarrow{P} \text{TPR}_D[\text{sign} \circ (\eta(x) - c)] \text{ and} \\ \text{TNR}_D[\text{sign} \circ (\hat{\eta}_S(x) - c)] &\xrightarrow{P} \text{TNR}_D[\text{sign} \circ (\eta(x) - c)] \\ \iff \mathbf{P}(\text{sign} \circ (\hat{\eta}_S(x) - c) = 1 \mid y = 1) &\xrightarrow{P} \mathbf{P}(\text{sign} \circ (\eta(x) - c) = 1 \mid y = 1) \text{ and} \\ \mathbf{P}(\text{sign} \circ (\hat{\eta}_S(x) - c) = -1 \mid y = -1) &\xrightarrow{P} \mathbf{P}(\text{sign} \circ (\eta(x) - c) = -1 \mid y = -1) \\ \iff \mathbf{P}(\hat{\eta}_S(x) > c \mid y = 1) &\xrightarrow{P} \mathbf{P}(\eta(x) > c \mid y = 1) \text{ and} \\ \mathbf{P}(\hat{\eta}_S(x) \leq c \mid y = -1) &\xrightarrow{P} \mathbf{P}(\eta(x) \leq c \mid y = -1) \\ \iff \mathbf{P}(\hat{\eta}_S(x) \leq c \mid y = 1) &\xrightarrow{P} \mathbf{P}(\eta(x) \leq c \mid y = 1) \text{ and} \\ \mathbf{P}(\hat{\eta}_S(x) \leq c \mid y = -1) &\xrightarrow{P} \mathbf{P}(\eta(x) \leq c \mid y = -1) \\ \iff \mathbf{P}_{x|y=1}(\hat{\eta}_S(x) \leq c) &\xrightarrow{P} \mathbf{P}_{x|y=1}(\eta(x) \leq c) \text{ and} \\ \mathbf{P}_{x|y=-1}(\hat{\eta}_S(x) \leq c) &\xrightarrow{P} \mathbf{P}_{x|y=-1}(\eta(x) \leq c). \end{aligned} \quad (3)$$

We now analyze the  $L_1$ -consistency guarantee assumed in the statement of Lemma 2, namely  $\mathbf{E}_x[|\hat{\eta}_S(x) - \eta(x)|] \xrightarrow{P} 0$ . We begin by expanding this term.

$$\begin{aligned} \mathbf{E}_x[|\hat{\eta}_S(x) - \eta(x)|] &= p \cdot \mathbf{E}_x[|\hat{\eta}_S(x) - \eta(x)| \mid y = 1] + (1 - p) \cdot \mathbf{E}_x[|\hat{\eta}_S(x) - \eta(x)| \mid y = -1] \\ &= p \cdot \mathbf{E}_{x|y=1}[|\hat{\eta}_S(x) - \eta(x)|] + (1 - p) \cdot \mathbf{E}_{x|y=-1}[|\hat{\eta}_S(x) - \eta(x)|]. \end{aligned}$$

Using the above expansion and the given guarantee on  $\hat{\eta}_S$  (along with  $p \in (0, 1)$ ), we obtain  $\mathbf{E}_{x|y=1}[|\hat{\eta}_S(x) - \eta(x)|] \xrightarrow{P} 0$  and  $\mathbf{E}_{x|y=-1}[|\hat{\eta}_S(x) - \eta(x)|] \xrightarrow{P} 0$ <sup>7</sup>. Applying Markov inequality for the random variable  $|\hat{\eta}_S(x) - \eta(x)|$  for a fixed  $S$ , we have for any  $\epsilon_1 > 0$ ,

$$\begin{aligned} \mathbf{P}_{x|y=1}(|\hat{\eta}_S(x) - \eta(x)| \geq \epsilon_1) &\leq \frac{\mathbf{E}_{x|y=1}[|\hat{\eta}_S(x) - \eta(x)|]}{\epsilon_1} \\ \text{and } \mathbf{P}_{x|y=-1}(|\hat{\eta}_S(x) - \eta(x)| \geq \epsilon_1) &\leq \frac{\mathbf{E}_{x|y=-1}[|\hat{\eta}_S(x) - \eta(x)|]}{\epsilon_1}, \end{aligned}$$

which in turn yields for a fixed  $\epsilon_1 > 0$ ,

$$\mathbf{P}_{x|y=1}(|\hat{\eta}_S(x) - \eta(x)| \geq \epsilon_1) \xrightarrow{P} 0; \quad (4)$$

<sup>7</sup>Here, we make use of the fact that for any two sequences of non-negative random variables  $X_n$  and  $Y_n$  for which  $X_n + Y_n \xrightarrow{P} 0$ , we have  $X_n \xrightarrow{P} 0$  and  $Y_n \xrightarrow{P} 0$ .

$$\mathbf{P}_{x|y=-1}(|\hat{\eta}_S(x) - \eta(x)| \geq \epsilon_1) \xrightarrow{P} 0, \quad (5)$$

where recall that the convergence in probability is w.r.t. to a random draw of  $S$  according to  $D^n$ .

In the rest of the proof, we shall make use of (a) the fact that Eq. (4) and (5) hold for arbitrarily small values of  $\epsilon_1$  and (b) our assumption that  $\mathbf{P}(\eta(x) \geq c | y = 1)$  and  $\mathbf{P}(\eta(x) \geq c | y = -1)$  are continuous at  $c \in (0, 1)$  to establish the desired result. We start proving the result w.r.t.  $x|y = 1$ . For a fixed  $S$  and a fixed  $\epsilon_2 > 0$ , we have

$$\begin{aligned} & \mathbf{P}_{x|y=1}(\hat{\eta}_S(x) \leq c) \\ &= \mathbf{P}_{x|y=1}(\hat{\eta}_S(x) \leq c, \eta(x) \leq c + \epsilon_2) + \mathbf{P}_{x|y=1}(\hat{\eta}_S(x) \leq c, \eta(x) > c + \epsilon_2) \\ &\leq \mathbf{P}_{x|y=1}(\eta(x) \leq c + \epsilon_2) + \mathbf{P}_{x|y=1}(|\hat{\eta}_S(x) - \eta(x)| \geq \epsilon_2), \end{aligned} \quad (6)$$

and

$$\begin{aligned} & \mathbf{P}_{x|y=1}(\eta(x) \leq c - \epsilon_2) \\ &= \mathbf{P}_{x|y=1}(\hat{\eta}_S(x) \leq c, \eta(x) \leq c - \epsilon_2) + \mathbf{P}_{x|y=1}(\hat{\eta}_S(x) > c, \eta(x) \leq c - \epsilon_2) \\ &\leq \mathbf{P}_{x|y=1}(\hat{\eta}_S(x) \leq c) + \mathbf{P}_{x|y=1}(|\hat{\eta}_S(x) - \eta(x)| \geq \epsilon_2). \end{aligned} \quad (7)$$

Consequently from Eq. (6) and (7), we get

$$\begin{aligned} & \mathbf{P}_{x|y=1}(\eta(x) \leq c - \epsilon_2) - \mathbf{P}_{x|y=1}(|\hat{\eta}_S(x) - \eta(x)| \geq \epsilon_2) \leq \mathbf{P}_{x|y=1}(\hat{\eta}_S(x) \leq c) \\ & \text{and } \mathbf{P}_{x|y=1}(\hat{\eta}_S(x) \leq c) \leq \mathbf{P}_{x|y=1}(\eta(x) \leq c + \epsilon_2) + \mathbf{P}_{x|y=1}(|\hat{\eta}_S(x) - \eta(x)| \geq \epsilon_2). \end{aligned}$$

Subtracting the term  $\mathbf{P}_{x|y=1}(\eta(x) \leq c)$  from both sides in each of the above inequalities and combining the resulting inequalities then gives us

$$\begin{aligned} & |\mathbf{P}_{x|y=1}(\hat{\eta}_S(x) \leq c) - \mathbf{P}_{x|y=1}(\eta(x) \leq c)| \leq \\ & \max \left\{ \underbrace{\mathbf{P}_{x|y=1}(|\hat{\eta}_S(x) - \eta(x)| \geq \epsilon_2) + \mathbf{P}_{x|y=1}(\eta(x) \leq c + \epsilon_2) - \mathbf{P}_{x|y=1}(\eta(x) \leq c)}_{\text{term}_1}, \right. \\ & \quad \left. \underbrace{\mathbf{P}_{x|y=1}(|\hat{\eta}_S(x) - \eta(x)| \geq \epsilon_2) - \mathbf{P}_{x|y=1}(\eta(x) \leq c - \epsilon_2) + \mathbf{P}_{x|y=1}(\eta(x) \leq c)}_{\text{term}_2} \right\}. \end{aligned} \quad (8)$$

Keeping  $S$  fixed, we now allow  $\epsilon_2 \rightarrow 0$ . In particular, by our assumption that  $\mathbf{P}_{x|y=1}(\eta(x) \leq c)$  is continuous at  $c$ , for the terms inside the above ‘max’, we have:

$$\lim_{\epsilon_2 \rightarrow 0} \text{term}_1 = \lim_{\epsilon_2 \rightarrow 0} \mathbf{P}_{x|y=1}(|\hat{\eta}_S(x) - \eta(x)| \geq \epsilon_2);$$

$$\lim_{\epsilon_2 \rightarrow 0} \text{term}_2 = \lim_{\epsilon_2 \rightarrow 0} \mathbf{P}_{x|y=1}(|\hat{\eta}_S(x) - \eta(x)| \geq \epsilon_2).$$

Thus for a fixed  $S$ , the following holds from Eq. (8):

$$0 \leq |\mathbf{P}_{x|y=1}(\hat{\eta}_S(x) \leq c) - \mathbf{P}_{x|y=1}(\eta(x) \leq c)| \leq \lim_{\epsilon_2 \rightarrow 0} \mathbf{P}_{x|y=1}(|\hat{\eta}_S(x) - \eta(x)| \geq \epsilon_2).$$

Now, from an application of Eq. (4) (which holds for arbitrarily small  $\epsilon_1$ ), we obtain the following convergence in probability over a random draw of  $S$  from  $D^n$ :

$$|\mathbf{P}_{x|y=1}(\hat{\eta}_S(x) \leq c) - \mathbf{P}_{x|y=1}(\eta(x) \leq c)| \xrightarrow{P} 0,$$

which in turn, implies

$$\mathbf{P}_{x|y=1}(\hat{\eta}_S(x) \leq c) \xrightarrow{P} \mathbf{P}_{x|y=1}(\eta(x) \leq c).$$

This is the desired relation w.r.t  $x|y = 1$  (as seen in Eq. (3)). The desired result w.r.t.  $x|y = -1$  follows likewise.  $\square$

## B.2 Complete proof for Lemma 4

*Proof.* Define for  $i, j \in \{-1, 1\}$ :

$$\hat{p}_{i,j,n}[h] = \sum_{k=1}^n \mathbf{1}(y_k = i, h(x_k) = j)/n \quad \text{and} \quad p_{ij}[h] = \mathbf{E}_D[\mathbf{1}(y = i, h(x) = j)].$$

For a fixed  $h \in \mathcal{T}_f$ , by the weak law of large numbers (WLLN), we have  $\forall i, j$ :

$$\hat{p}_{i,j,n}[h] \xrightarrow{P} p_{ij}[h],$$

where the convergence in probability is over draw of  $S \sim D^n$ . Also,  $\hat{p}_S \xrightarrow{P} p$  (again by WLLN).

Given that

$$\widehat{\text{TPR}}_S[h] = \frac{1}{\hat{p}_S} \hat{p}_{1,1,n}[h] \quad \text{and} \quad \widehat{\text{TNR}}_S[h] = \frac{1}{(1 - \hat{p}_S)} \hat{p}_{-1,-1,n}[h],$$

we thus have

$$\widehat{\text{TPR}}_S[h] \xrightarrow{P} \frac{p_{1,1}[h]}{p} = \text{TPR}_D[h] \quad \text{and} \quad \widehat{\text{TNR}}_S[h] \xrightarrow{P} \frac{p_{-1,-1}[h]}{1 - p} = \text{TNR}_D[h].$$

In turn, by continuity of  $\Psi$ , we obtain

$$\widehat{\mathcal{P}}_S^\Psi[h] \xrightarrow{P} \mathcal{P}_D^\Psi[h].$$

□

## B.3 Complete proof for Lemma 5

*Proof.* Recall that any fixed  $h \in \mathcal{T}_f$  is of the form  $\text{sign} \circ (f(x) - c)$  for some constant  $c \in (0, 1)$ . Let  $p_{i,j}[h]$  and  $\hat{p}_{i,j,n}[h]$  be as defined in the proof of Lemma 4 (Section B.2). Since  $\text{VC-dimension}(\mathcal{T}_f) = 1$ , by standard VC-dimension based uniform convergence arguments, we can argue that for all  $i, j \in \{\pm 1\}$ , given any  $\epsilon' > 0$ ,

$$\mathbf{P}_{S \sim D^n} \left( \bigcup_{h \in \mathcal{T}_f} |\hat{p}_{i,j,n}[h] - p_{i,j}[h]| \geq \epsilon' \right) \rightarrow 0.$$

We also have  $\hat{p}_S \xrightarrow{P} p$  (by WLLN).

Now, as in the proof of Lemma 4, observing that TPR and TNR are continuous functions of the above quantities, it can be shown using an appropriate choice of  $\epsilon' > 0$  in the above expressions, and by an application of union bound, that for any given  $\epsilon > 0$ ,

$$\begin{aligned} \mathbf{P}_{S \sim D^n} \left( \bigcup_{h \in \mathcal{T}_f} \left\{ |\text{TPR}_D[h] - \widehat{\text{TPR}}_S[h]| \geq \epsilon \right\} \right) &\rightarrow 0 \\ \text{and} \quad \mathbf{P}_{S \sim D^n} \left( \bigcup_{h \in \mathcal{T}_f} \left\{ |\text{TNR}_D[h] - \widehat{\text{TNR}}_S[h]| \geq \epsilon \right\} \right) &\rightarrow 0. \end{aligned}$$

Once again, by continuity of  $\Psi$ , we have:

$$\mathbf{P}_{S \sim D^n} \left( \bigcup_{h \in \mathcal{T}_f} \left\{ |\mathcal{P}_D^\Psi[h] - \widehat{\mathcal{P}}_S^\Psi[h]| \geq \epsilon \right\} \right) \rightarrow 0 \text{ as } n \rightarrow \infty,$$

as desired. □

#### B.4 Complete proof for Lemma 9

*Proof.* Our proof is similar to that of Theorem 4 in [15]. Recall  $\mathcal{T}_\eta = \{\text{sign} \circ (\eta - t) \mid t \in [0, 1]\}$  and let  $h^* = \sup_{h \in \mathcal{T}_\eta} \mathcal{P}_D^{\text{G-TP/PR}}[h]$  (the existence of this classifier is guaranteed by Assumption A).

We shall show that for any  $h \notin \mathcal{T}_\eta$ ,  $\exists \tilde{h} \in \mathcal{T}_\eta$  such that  $\mathcal{P}_D^{\text{G-TP/PR}}[\tilde{h}] \geq \mathcal{P}_D^{\text{G-TP/PR}}[h]$ , thus giving us  $\mathcal{P}_D^{\text{G-TP/PR}}[h^*] \geq \mathcal{P}_D^{\text{G-TP/PR}}[\tilde{h}] \geq \mathcal{P}_D^{\text{G-TP/PR}}[h]$ ; this would imply that the optimal predictor for G-TP/PR is indeed of the desired threshold form.

For any  $h \notin \mathcal{T}_\eta$ , upon arranging all instances  $x \in \mathcal{X}$  in non-increasing order of  $\eta$ , we can find disjoint subsets  $A, B, C \subseteq \mathcal{X}$ , with  $\sup_{x \in A} \eta(x) \leq \inf_{x \in B} \eta(x) \leq \sup_{x \in B} \eta(x) \leq \inf_{x \in C} \eta(x)$ , such that:  $A \cup C = \{x \in \mathcal{X} \mid h(x) = 1\}$  and  $B \subseteq \{x \in \mathcal{X} \mid h(x) = -1\}$ . We now define two new classifiers:

$$h_A(x) = \begin{cases} -1 & \text{if } x \in A \\ h(x) & \text{o/w} \end{cases} \quad \text{and} \quad h_B(x) = \begin{cases} 1 & \text{if } x \in B \\ h(x) & \text{o/w} \end{cases}.$$

We now claim that one of these newly defined classifiers must be at least as good as  $h$  w.r.t. G-TP/PR (this claim is proved below).

*Claim.* Either  $\mathcal{P}_D^{\text{G-TP/PR}}[h_A] \geq \mathcal{P}_D^{\text{G-TP/PR}}[h]$  or  $\mathcal{P}_D^{\text{G-TP/PR}}[h_B] \geq \mathcal{P}_D^{\text{G-TP/PR}}[h]$ .

According to the above claim, any classifier that is not of the form  $\text{sign} \circ (\eta(x) - c)$  is only as good as one of  $h_B$  or  $h_A$  w.r.t. G-TP/PR. We could now imagine one of  $h_A$  or  $h_B$  as the new  $h$  and make repeated use of the above exchange argument to eventually arrive at a classifier  $\tilde{h}$  in  $\mathcal{T}_\eta$  with  $\mathcal{P}_D^{\text{G-TP/PR}}[\tilde{h}] \geq \mathcal{P}_D^{\text{G-TP/PR}}[h]$ , as desired.

It remains to be shown that the above claim is true.

*Proof of Claim.* Let us assume the contrary, that  $\mathcal{P}_D^{\text{G-TP/PR}}[h] > \mathcal{P}_D^{\text{G-TP/PR}}[h_A]$  and  $\mathcal{P}_D^{\text{G-TP/PR}}[h] > \mathcal{P}_D^{\text{G-TP/PR}}[h_B]$ , and arrive at a contradiction. Let  $a = \mathbf{P}(x \in A)$ ,  $b = \mathbf{P}(x \in B)$  and  $c = \mathbf{P}(x \in C)$ , and assume without loss of generality that  $a, b > 0$ . Let  $\alpha = \mathbf{E}_x[\eta(x) \mid x \in A]$ ,  $\beta = \mathbf{E}_x[\eta(x) \mid x \in B]$  and  $\gamma = \mathbf{E}_x[\eta(x) \mid x \in C]$ . It is clearly seen that  $0 \leq \alpha \leq \beta \leq \gamma$ . With the above definitions, we have,  $\text{TPR}_D(h) = \frac{a\alpha + c\gamma}{p}$  and  $\text{Prec}_D(h) = \frac{a\alpha + c\gamma}{a+c}$ , and in turn,  $\mathcal{P}_D^{\text{G-TP/PR}}(h) = \sqrt{\frac{(a\alpha + c\gamma)^2}{p(a+c)}}$ , while  $\mathcal{P}_D^{\text{G-TP/PR}}(h_B) = \sqrt{\frac{(a\alpha + b\beta + c\gamma)^2}{p(a+b+c)}}$  and  $\mathcal{P}_D^{\text{G-TP/PR}}(h_A) = \sqrt{\frac{(c\gamma)^2}{p(c)}}$ .

By our contradiction hypothesis,

$$\sqrt{\frac{(a\alpha + c\gamma)^2}{p(a+c)}} > \sqrt{\frac{(a\alpha + b\beta + c\gamma)^2}{p(a+b+c)}} \quad \text{and} \quad \sqrt{\frac{(a\alpha + c\gamma)^2}{p(a+c)}} > \sqrt{\frac{(c\gamma)^2}{p(c)}},$$

which implies

$$(a+b+c)(a\alpha + c\gamma)^2 > (a+c)(a\alpha + b\beta + c\gamma)^2 \tag{9}$$

$$\text{and } c(a\alpha + c\gamma)^2 > (a+c)(c\gamma)^2. \tag{10}$$

Now, from Eq. (10), we have

$$c(a^2\alpha^2 + c^2\gamma^2 + 2a\alpha c\gamma) > ac^2\gamma^2 + c^3\gamma^2 \quad \text{or} \quad aca^2 + 2c^2\alpha\gamma > c^2\gamma^2, \tag{11}$$

Next, from Eq. (9), we have

$$(a+b+c)(a^2\alpha^2 + c^2\gamma^2 + 2a\alpha c\gamma) > (a+c)(a^2\alpha^2 + b^2\beta^2 + c^2\gamma^2 + 2ab\alpha\beta + 2bc\beta\gamma + 2aca\gamma),$$

which can be simplified as

$$b(a^2\alpha^2 + c^2\gamma^2 + 2a\alpha c\gamma) > (a+c)(b^2\beta^2 + 2ab\alpha\beta + 2bc\beta\gamma).$$

Using the upper bound for the term  $c^2\gamma^2$  from Eq. (11) in the above inequality, we get

$$\begin{aligned} b(a^2\alpha^2 + aca^2 + 2c^2\alpha\gamma + 2aca\gamma) &> (a+c)(b^2\beta^2 + 2ab\alpha\beta + 2bc\beta\gamma) \\ \implies b(a+c)(a\alpha^2 + 2ca\gamma) &> (a+c)(b^2\beta^2 + 2ab\alpha\beta + 2bc\beta\gamma) \end{aligned}$$

$$\implies a\alpha^2 + 2c\alpha\gamma > b\beta^2 + 2a\alpha\beta + 2c\beta\gamma.$$

Using  $\beta \geq \alpha$ , we can now lower bound the right hand side in the above inequality to get

$$a\alpha^2 + 2c\alpha\gamma > b\beta^2 + 2a\alpha^2 + 2c\alpha\gamma \implies 0 > a\alpha^2 + b\beta^2,$$

which is a contradiction since  $a, b > 0$  and  $\alpha, \beta \geq 0$ . This proves the claim.  $\square$

### B.5 Complete proof for Lemma 11

*Proof.* Recall  $\mathcal{T}_\eta = \{\text{sign} \circ (\eta - t) \mid t \in [0, 1]\}$  and let  $h^* = \sup_{h \in \mathcal{T}_\eta} \mathcal{P}_D^\Psi[h]$  (the existence of this classifier is guaranteed by Assumption B). We shall now use an exchange argument (that makes use of Assumption B) to show that for any  $h \notin \mathcal{T}_\eta$ ,  $\exists \tilde{h} \in \mathcal{T}_\eta$  such that  $\mathcal{P}_D^\Psi[\tilde{h}] \geq \mathcal{P}_D^\Psi[h]$ , thus implying  $\mathcal{P}_D^\Psi[h^*] \geq \mathcal{P}_D^\Psi[\tilde{h}] \geq \mathcal{P}_D^\Psi[h]$ ; this would imply that the optimal predictor for  $\mathcal{P}^\Psi$  is indeed of the desired threshold form. In particular, we shall show that  $\text{TPR}_D[\tilde{h}] \geq \text{TPR}_D[h]$  and  $\text{TNR}_D[\tilde{h}] \geq \text{TNR}_D[h]$ , which by the monotonicity assumption on  $\Psi$  yields  $\mathcal{P}_D^\Psi[\tilde{h}] \geq \mathcal{P}_D^\Psi[h]$ .

For any  $h \notin \mathcal{T}_\eta$ , upon arranging all instances  $x \in \mathcal{X}$  in non-increasing order of  $\eta$ , we can find disjoint subsets  $A \subseteq \{x \in \mathcal{X} \mid h(x) = 1\}$  and  $B \subseteq \{x \in \mathcal{X} \mid h(x) = -1\}$  such that  $\sup_{x \in A} \eta(x) \leq \inf_{x \in B} \eta(x)$ . Let  $a = \mathbf{P}(x \in A)$  and  $b = \mathbf{P}(x \in B)$ ; assume without loss of generality,  $a, b > 0$ .

Let us consider the case where  $a \geq b$ ; here we choose a set  $A' \subseteq A$  with  $\mathbf{P}(x \in A') = b$ , and define a classifier  $h'$  as

$$h'(x) = \begin{cases} 1 & \text{if } x \in B \\ -1 & \text{if } x \in A' \\ h(x) & \text{o/w} \end{cases}.$$

We shall now show that  $\text{TPR}_D[h'] \geq \text{TPR}_D[h]$  and  $\text{TNR}_D[h'] \geq \text{TNR}_D[h]$ . In particular,

$$\begin{aligned} & \text{TPR}_D[h'] - \text{TPR}_D[h] \\ &= \mathbf{P}(h'(x) = 1 \mid y = 1) - \mathbf{P}(h(x) = 1 \mid y = 1) \\ &= \frac{1}{p} \mathbf{E}_x[\eta(x) \mathbf{1}(h'(x) = 1)] - \frac{1}{p} \mathbf{E}_x[\eta(x) \mathbf{1}(h(x) = 1)] \\ &= \frac{1}{p} [\mathbf{E}_x[\eta(x) \mathbf{1}(h'(x) = 1, h(x) = -1)] - \mathbf{E}_x[\eta(x) \mathbf{1}(h(x) = 1, h'(x) = -1)]] \\ &= \frac{1}{p} [\mathbf{E}_x[\eta(x) \mathbf{1}(x \in B)] - \mathbf{E}_x[\eta(x) \mathbf{1}(x \in A')]] \quad (\text{by definition of } h') \\ &\geq \frac{1}{p} \left[ \left( \inf_{x \in B} \eta(x) \right) \mathbf{P}(x \in B) - \left( \sup_{x \in A'} \eta(x) \right) \mathbf{P}(x \in A') \right] \\ &= \frac{b}{p} \left[ \inf_{x \in B} \eta(x) - \sup_{x \in A'} \eta(x) \right] \quad (\text{using } \mathbf{P}(x \in B) = \mathbf{P}(x \in A') = b) \\ &\geq \frac{b}{p} \left[ \inf_{x \in B} \eta(x) - \sup_{x \in A} \eta(x) \right] \quad (\text{using } A' \subseteq A) \\ &\geq 0, \end{aligned}$$

where the last step follows from the definition of sets  $A$  and  $B$ ; in a similar manner, one can show that  $\text{TNR}_D[h'] - \text{TNR}_D[h] \geq 0$ .

For the case when  $a < b$ , we choose a set  $B' \subset B$  with  $\mathbf{P}(x \in B') = a$ , and define  $h'$  as

$$h'(x) = \begin{cases} 1 & \text{if } x \in B' \\ -1 & \text{if } x \in A \\ h(x) & \text{o/w} \end{cases}.$$

Similar to the previous case, one can show that  $\text{TPR}_D[h'] \geq \text{TPR}_D[h]$  and  $\text{TNR}_D[h'] \geq \text{TNR}_D[h]$ .

In both these cases, we have by monotonicity of  $\Psi$  that  $\mathcal{P}_D^\Psi[h'] \geq \mathcal{P}_D^\Psi[h]$ . Note that unless  $a = b$ ,  $h' \notin \mathcal{T}_\eta$ . Hence, when  $a \neq b$ , we can view  $h'$  as the new  $h$ , and apply the above exchange argument repeatedly to eventually arrive at  $\tilde{h} \in \mathcal{T}_\eta$  with  $\mathcal{P}_D^\Psi[\tilde{h}] \geq \mathcal{P}_D^\Psi[h]$ , as desired.  $\square$



## C Example Distribution Where the Optimal Classifier for G-mean, H-mean and Q-mean is Not Threshold-based

We now present an example of a distribution under which the optimal classifier for the G-Mean, H-Mean and Q-Mean performance measures (see Table 1) is not of the requisite thresholded form, i.e. not of the form  $\text{sign} \circ (\eta(x) - c)$  for any  $c \in (0, 1)$ .

Let  $\mathcal{X} = \{x_1, x_2, x_3\}$ . For some a constant  $\epsilon \in (0, 1/2)$ , consider the following distribution  $D$  over  $\mathcal{X} \times \{\pm 1\}$ :

|       | $\mathbf{P}(x)$ | $\eta(x) = \mathbf{P}(y = 1 x)$ |
|-------|-----------------|---------------------------------|
| $x_1$ | 0.25            | $1/2 - \epsilon$                |
| $x_2$ | 0.5             | $1/2$                           |
| $x_3$ | 0.25            | $1/2 + \epsilon$                |

Table 4: Example distribution  $D$  over  $\mathcal{X} \times \{\pm 1\}$ , where the optimal classifier for the G-mean, H-mean and Q-mean performance measures is not threshold-based.

Consider the following binary classifiers defined on  $\mathcal{X}$ :

$$\begin{aligned}
\tilde{h}_0(x) &= \begin{cases} 1 & \text{if } x \in \{x_1, x_2, x_3\} \\ -1 & \text{o/w} \end{cases} \\
\tilde{h}_1(x) &= \begin{cases} 1 & \text{if } x \in \{x_1, x_2\} \\ -1 & \text{o/w} \end{cases} \\
\tilde{h}_2(x) &= \begin{cases} 1 & \text{if } x \in \{x_1\} \\ -1 & \text{o/w} \end{cases} \\
\tilde{h}_3(x) &= \begin{cases} -1 & \text{if } x \in \{x_1, x_2, x_3\} \\ 1 & \text{o/w} \end{cases} \\
h_4(x) &= \begin{cases} 1 & \text{if } x \in \{x_2\} \\ -1 & \text{o/w} \end{cases},
\end{aligned}$$

where the first four classifiers constitute the set of all classifiers on  $\mathcal{X}$  of the form  $\text{sign} \circ (\eta - c)$  for  $c \in (0, 1)$  (indicated by a ‘ $\sim$ ’), while the last one is not of a thresholded form. We next list out in Table 5 the values of the G-mean, H-mean and Q-mean performance measures for these classifiers. It can be seen that for distributions defined using a small value of  $\epsilon \in (0, 0.5)$ , for each of G-Mean, H-Mean and Q-Mean, the classifier  $h_4$  offers a higher performance measure value than any of the threshold-based classifiers. Clearly, threshold-based classifiers are not optimal under distributions of the above form with small values of  $\epsilon$ .

|               | TPR                | TNR                | G-Mean<br>$\sqrt{\text{TPR} \cdot \text{TNR}}$ | H-Mean<br>$2/(\frac{1}{\text{TPR}} + \frac{1}{\text{TNR}})$ | Q-Mean<br>$1 - ((1 - \text{TPR})^2 + (1 - \text{TNR})^2)/2$ |
|---------------|--------------------|--------------------|------------------------------------------------|-------------------------------------------------------------|-------------------------------------------------------------|
| $\tilde{h}_0$ | 1                  | 0                  | 0                                              | 0                                                           | $1/2$                                                       |
| $\tilde{h}_1$ | $3/4 + \epsilon/2$ | $1/4 + \epsilon/2$ | $\sqrt{3}/4 + O(\sqrt{\epsilon})$              | $3/8 + O(\epsilon)$                                         | $11/16 + O(\epsilon^2)$                                     |
| $\tilde{h}_2$ | $1/4 + \epsilon/2$ | $3/4 + \epsilon/2$ | $\sqrt{3}/4 + O(\sqrt{\epsilon})$              | $3/8 + O(\epsilon)$                                         | $11/16 + O(\epsilon^2)$                                     |
| $\tilde{h}_3$ | 0                  | 1                  | 0                                              | 0                                                           | $1/2$                                                       |
| $h_4$         | $1/2$              | $1/2$              | <b><math>1/2</math></b>                        | <b><math>1/2</math></b>                                     | <b><math>3/4</math></b>                                     |

Table 5: Performance measures G-mean, H-mean and Q-mean evaluated for classifiers  $\tilde{h}_0, \tilde{h}_1, \tilde{h}_2, \tilde{h}_3$  and  $h_4$  under the example distribution  $D$  in Table 4. Here  $\epsilon \in (0, 0.5)$ . For small values of  $\epsilon$ , classifier  $h_4$  offers the best value w.r.t. all measures (highlighted in bold).
